# Supplementary material for: Obesity, Abdominal Obesity and Chronic Kidney Disease in Young Adults: A Nationwide Population-Based Cohort Study
Source: PubMed Central journal article supplement (PMC7962022; doi:10.3390/jcm10051065), 2021-03-04
Supplement: jcm-10-01065-s001.pdf [file jcm-10-01065-s001.pdf]

**Supplementary Table 1.** Medication rate for diabetes mellitus, hypertension and dyslipidemia

| Group             | Total<br>(N=3 030 884)               |                              | None CKD<br>(N=3 025 031)    | CKD<br>(N=5 853)           |                        | <i>P</i> value |
|-------------------|--------------------------------------|------------------------------|------------------------------|----------------------------|------------------------|----------------|
| Diabetes mellitus | 15631 (0.52)                         |                              | 15360 (0.51)                 | 271 (4.63)                 |                        | <.0001         |
| Hypertension      | 51050 (1.68)                         |                              | 50145 (1.66)                 | 905 (15.46)                |                        | <.0001         |
| Dyslipidemia      | 41513 (1.37)                         |                              | 41015 (1.36)                 | 498 (8.51)                 |                        | <.0001         |
| Variable          | Distribution of body mass index      |                              |                              |                            |                        | <i>P</i>       |
|                   | <18.5<br>(N=190 346)                 | 18.5~23<br>(N=1 360 230)     | 23~25<br>(N=634 091)         | 25~30<br>(N=729 510)       | 30~<br>(N=116 707)     |                |
| Diabetes mellitus | 187 (0.1)                            | 2922 (0.21)                  | 2811 (0.44)                  | 6815 (0.93)                | 2896 (2.48)            | <.0001         |
| Hypertension      | 529 (0.28)                           | 8907 (0.65)                  | 9587 (1.51)                  | 23054 (3.16)               | 8973 (7.69)            | <.0001         |
| Dyslipidemia      | 396 (0.21)                           | 6966 (0.51)                  | 8516 (1.34)                  | 19525 (2.68)               | 6110 (5.24)            | <.0001         |
| Variable          | Distribution of waist circumferences |                              |                              |                            |                        | <i>P</i>       |
|                   | <70/<65<br>(N=227 355)               | 70~79/65~74<br>(N=1 228 295) | 80~89/75~84<br>(N=1 122 351) | 90~99/85~94<br>(N=338 656) | >100/>95<br>(N=64 227) |                |
| Diabetes mellitus | 268 (0.1)                            | 2667 (0.22)                  | 6351 (0.57)                  | 4400 (1.3)                 | 1945 (3.03)            | <.0001         |
| Hypertension      | 878 (0.32)                           | 8452 (0.69)                  | 21649 (1.93)                 | 14575 (4.3)                | 5496 (8.56)            | <.0001         |
| Dyslipidemia      | 641 (0.23)                           | 6602 (0.54)                  | 19002 (1.69)                 | 11621 (3.43)               | 3647 (5.68)            | <.0001         |
